# Supplementary material
Source: Royal Society of Chemistry journal article supplement (doi:10.1039/d5ja00501a)
Supplement: d5ja00501a1.xlsx [file d5ja00501a1.xlsx]

## Sheet: Table S1
Table S1: The composition and source of geological reference materials in this study.
Sample type	Sample	The source of sample	SiO2	Al2O3	TFe2O3	MgO	CaO	Na2O	K2O	TiO2	Sr	Ag	As	Au	B	Ba	Be	Bi	Br	Cd	Ce	Cl	Co	Cr	Cs	Cu	Dy	Er	Eu	F	Ga	Gd	Ge	Hf	Hg	Ho	I	In	La	Li	Lu	Mn	Mo	Nb	Nd	Ni	P	Pb	Pr
Basalt	BHVO-2	the United States Geological Survey (USGS)	49.6	13.44	12.39	7.257	11.4	2.219	0.513	2.731	396.57					135.28					38.42		42.6	286.58	0.1	128.85	5.49	2.58	2.11		21.41	6.4		4.32		0.99			15.41	4.57	0.29			18.55	25.24	113.09		2.48	5.37
Basalt	GSR-3	the Institute of Geophysical and Geochemical Research (IGGE) of the Chinese Academy of Geological Sciences	44.64	13.83	13.4	7.77	8.81	3.38	2.32		1100	0.04			3.5	527	2.5	0.048		0.067	105		46.5	134		49	5.6	2	3.2	700	24.8	8.5	0.98	6.5	0.006	0.88		0.064	56	9.5	0.19	1310	2.6	68	54	140	4130		13.2
Basalt	JB-1B	the Geological Survey of Japan (GSJ)	51.11	14.38	9.02	8.14	9.6	2.63	1.32	1.26	444	0.049	2.33	0.79	9.35	493	1.33	0.033	0.58	0.11	67.8	176	38.2	425	1.23	55.1	4.14	2.27	1.49	385	17.9	4.9	0.9	3.31	29.9	0.79	0.03	0.058	38.6	11.5	0.31	0.118	27.4	33.3	26.8	133	0.111	10	7.01
Basalt	JB-2	the Geological Survey of Japan (GSJ)	53.25	14.64	14.25	4.62	9.82	2.04	0.42	1.19	178	0.072	2.87	5.64	30.2	222	0.26	0.033		0.14	6.76	281	38	28.1	0.85	225	3.73	2.6	0.86	98.5	17	3.28	1.35	1.49	4.78	0.75	0.049	0.094	2.35	7.78	0.4	0.169	1.08	1.58	6.63	16.6	0.044	5.36	1.01
Basalt	JB-3	the Geological Survey of Japan (GSJ)	51.04	17.2	11.88	5.2	9.86	2.82	0.78	1.45	403	0.075	1.84	1.99	18	245	0.81	0.023		0.081	21.5	259	34.3	58.1	0.94	194	4.54	2.49	1.32	253	19.8	4.67	1.12	2.67	2.4	0.8	0.028	0.069	8.81	7.21	0.39	0.137	1.09	2.47	15.6	36.2	0.128	5.58	3.11
Andesite	AGV-2	the United States Geological Survey (USGS)	59.14	17.03	6.78	1.8	5.15	4.204	2.898	1.051	658.54					1172.77					70.24		15.2	15.96	1.13	45.77	3.62	1.85	1.6		21.02	4.88		5.21		0.68			37.99	10.53	0.25			14.36	31.08	18.45		12.48	8.16
Andesite	JA-1	the Geological Survey of Japan (GSJ)	64.43	15.19	7.05	1.54	5.72	3.91	0.779	0.85	263	0.033	2.78	0.16	21	311	0.5	0.0091		0.11	13.3	43	12.3	7.83	0.62	43	4.55	3.04	1.2	161	16.7	4.36	1.33	2.42	11.7	0.95	0.015	0.0494	5.24	10.8	0.47	0.122	1.59	1.85	10.9	3.49	0.072	6.55	1.71
Andesite	JA-2	the Geological Survey of Japan (GSJ)	56.42	15.41	6.21	7.6	6.29	3.11	1.81	0.66	248	0.043	0.85	0.26	20.7	321	2.05	0.07		0.078	32.7		29.5	436	4.63	29.7	2.8	1.48	0.93	223	16.9	3.06	1.05	2.86	1.8	0.5	0.005		15.8	27.3	0.27	0.084	0.6	9.47	13.9	130	0.064	19.2	3.84
Andesite	JA-3	the Geological Survey of Japan (GSJ)	62.27	15.57	6.6	3.72	6.28	3.19	1.41	0.7	287	0.084	4.68	0.95	24.8	323	0.8	0.05		0.089	22.8		21.1	66.2	2.08	43.4	3.01	1.57	0.82	286	16.3	2.96		3.42	1.9	0.51			9.33	14.5	0.32	0.081	1.89	3.41	12.3	32.2	0.051	7.7	2.4
Andesite	GSR-2	the Institute of Geophysical and Geochemical Research (IGGE) of the Chinese Academy of Geological Sciences	60.62	16.17	4.9	1.72	5.2	3.86	1.89		790	0.071	2.1		4.7	1020	1.1	0.081		0.061	40		13.2	32	2.3	55	1.85	0.85	1.02	280	18.1	2.7	0.93	2.9	0.012	0.34		0.037	22	18.3	0.12	604	0.54	6.8	19	17	1030	11.3	4.9
Diabase	W-2a	the United States Geological Survey (USGS)	53.44	15.7	11.74	6.69	11.22	2.57	0.75	1.1	207.5		1		11.7	131.5	0.683	8	0.309		10.3		44	90	0.8	110	0.64	0.78	3.29		17	1.07	1.6	0.288		3.73	0.405	0.1	19.5	8.57	2.04	1269	2.8	6.7	12	70		5	22.8
Diabase	DNC-1a	the United States Geological Survey (USGS)	47.35	18.24	9.9	10.12	11.05	1.92	0.22	0.48	142	0				108			0.063			18.1	57	270	0	96			0.6								0.102		3.3						5.11	250
Granite	JG-1	the Geological Survey of Japan (GSJ)	72.3	14.24	2.18	0.74	2.2	3.38	3.98	0.26	184	0.034	0.33	0.11	6.87	466	3.15	0.5	0.068	0.04	45.8	58.1	4.06	53.2	10.1	2.52	4.14	2.16	0.73	498	17.8	4.28	1.44	3.56	16.5	0.81	0.012	0.044	22.4	86.6	0.39	0.049	1.75	12.4	19.3	7.47	0.043	25.4	4.83
Granite	GSR-1	the Institute of Geophysical and Geochemical Research (IGGE) of the Chinese Academy of Geological Sciences	72.83	13.4	2.14	0.42	1.55	3.13	5.01		106	0.033	2.1		24	343	12.4	0.53		0.029	108	127	3.4	3.6	38.4	3.2	10.2	6.5	0.85	2350	19	9.3	2	6.3	0.0041	2.05			54	131	1.15	463	3.5	40	47	2.3	405	31	12.7
Seawater	IAPSO	Ocean Scientific International Ltd (OSIL, United Kingdom)				0.215	0.05768	1.45161	0.0480637		7.9				4.5				67			1.9354								1.3
Limestone	COQ-1	the United States Geological Survey (USGS)	3.54	0.37	2.93	1.2	48.55	0.05	0.16	0.15	12000	0				967	1.2		0.071		1500	27.5	2.76	0.36	0.357	2.85	18.6	8.07	14		10.1	50	0	0.213		3.29	0.331		750	3.4	0.726	3565	7.4	3862	412	3.4		4.33	133
Dolomite	JDO-1	the Geological Survey of Japan (GSJ)	0.216	0.0174	0.0208	18.47	33.96	0.0129	0.00232	0.00133	116	0.0019	0.114	0.09	-	6.14	-	-	0.79	0.644	2.49		0.168	7.93	0.07	1.41	0.814		0.176	246		1.3	-	0.0897	9.5	0.42			7.93	0.4	0.0494		0.78	0.4	5.25	2.9		0.95	0.956
Tholeiite	BIR-1a	the United States Geological Survey (USGS)	48.45	15.9	11.34	9.88	13.71	1.73	0.14		73	0.0217	0.37		1.1	5	0.105	0.1	0.037	0.0377	1.76	8.2	49.22	350	0	99.1	2.49	1.57	0.5		13.95	1.675	1.17	0.5		0.55	0.007	0.0157	0.5	2.38	0.2	1297	0.1	0.4	2.27	148		2.89	0.33
Gabbro	JGB-2	the Geological Survey of Japan (GSJ)	46.47	23.48	6.69	6.18	14.1	0.92	0.059	0.56	438	-	0.96	-	4.9	36.5	-	0.022		-	3		25.8	125	0.51	11.4	0.6	0.36	0.59		15.9	0.48		0.25	1.9	0.15			1.5	15.7	0.062		0.42	1.9	1.8	13.6		1.5	0.39
Syenite	STM-2	the United States Geological Survey (USGS)	60.7	18.6	5.4	0.12	1.12	8.8	4.17	0.15	737					590		0.08		1.27	251		0.67	1.4	1.39	0.9	6.98	3.8	3.216		11	7.97		25.5		1.3			144		0.52		5.1	254.3	77.1	0.8		11.5	23.71
Quartz Sandstone	GSR-4	the Institute of Geophysical and Geochemical Research (IGGE) of the Chinese Academy of Geological Sciences	90.36	3.52	3.22	0.082	0.3	0.061	0.65		58	0.062	9.1		34	143	0.97	0.18		0.06	48		6.4	20	1.8	19	4.1	2	1.02	183	5.3	4.5	1.16	6.6	0.008	0.75			21	11.1	0.3	155	0.76	5.9	21	16.6	970	7.6	5.4
Shale	GSR-5	the Institute of Geophysical and Geochemical Research (IGGE) of the Chinese Academy of Geological Sciences	59.23	18.82	7.6	2.01	0.6	0.35	4.16		90	0.047	1.4		154	450	3	0.23		0.033	109	41	21	99	14	42	5.1	2.7	1.7	1290	26	6.7	3.1	2.9	0.01	0.98	0.24	0.082	62	44	0.41	173	0.35	14.3	48	37	690	8.7	13.6
Amphibolite	GSR-15	the Institute of Geophysical and Geochemical Research (IGGE) of the Chinese Academy of Geological Sciences	49.6	13.8	14.8	7.2	9.6	2.07	0.48	0.93	142		26		12	62	0.34				7.7		52	137	1.8	84	3.5	2.3	0.91	200	17.2	2.8	1.46	1.5	0.0033	0.85			2.9	11.2	0.39	1600	0.15	2.7	6.5	117	360		1.25
[truncated: 19 more columns]

## Sheet: Table S2
Table S2:Instrument settings and operation parameters.
Instrument setting	MA	NP	NP	NP
Instrument model	Neptune Plus	Neptune Plus	Neptune Plus	Neptune Plus
Cooling Ar	~16 L/min	~16 L/min	~16 L/min	~16 L/min
Auxiliary Ar	~0.80 L/min	~0.85 L/min	~0.85 L/min	~0.85 L/min
Nebulizer Ar	~1.05 L/min	~0.95 L/min	~0.95 L/min	~0.95 L/min
Mass resolution	Low resolution	Low resolution	Low resolution	Low resolution
Solution uptake	~100 mL/min	~100 mL/min	~100 mL/min	~100 mL/min
RF power	1200W	1200W	1200W	1200W
Extraction voltage	2 kV	2 kV	2 kV	2 kV
Typical sensitivity	~60 V/ppm for 88Sr	~60 V/ppm for 88Sr	~60 V/ppm for 88Sr	~60 V/ppm for 88Sr
Cup configuration	L4(83Kr), L3(84Sr), L2(85Rb),L1(86Sr),C(87Sr), H1(88Sr), H2(90Zr), and H4(94Zr)	L3(85Rb),L2(86Sr),L1(87Sr), C(88Sr), H2(90Zr), and H4(94Zr)	L3(85Rb),L2(86Sr),L1(87Sr), C(88Sr), H2(90Zr), H3(91Zr), and H4(94Zr)	L3(85Rb),L2(86Sr),L1(87Sr), C(88Sr), H2(90Zr), H2(92Zr), and H4(94Zr)

## Sheet: Table S3
Table S3: The Sr isotopes of BHVO-2, IAPSO, and AGV-2 measured on two instruments.
Sample	No.	δ88/86Sr(‰)	2SD(‰)	n	87Sr/86Sr	2SD(10-6)	n	Instrument
BHVO-2	1	0.239909	0.0269096	3	0.703469	16	3	MA
	Replicate	0.253269	0.0490844	4	0.703516	22	4	NP
	2	0.25682	0.041168	3	0.703471	10	3	MA
	Replicate	0.262026	0.0344664	4	0.703511	15	4	NP
	3	0.243057	0.0132531	3	0.703473	4	3	MA
	Replicate	0.248483	0.042726	4	0.703511	5	4	NP
	4	0.2474	0.0224433	3	0.703475	13	3	MA
	Replicate	0.261919	0.0528927	4	0.703512	10	4	NP
	5	0.240011	0.030396	3	0.703466	17	3	MA
	Replicate	0.256668	0.044431	4	0.703507	21	4	NP
	6	0.239493	0.0464519	3	0.703469	19	3	MA
	Replicate	0.26209	0.0512348	4	0.703513	19	4	NP
IAPSO	1	0.381091	0.00888938	4	0.709182	30	4	MA
	Replicate	0.379931	0.0184321	4	0.709205	23	4	NP
	2	0.382508	0.0205237	4	0.709191	19	4	MA
	Replicate	0.377608	0.0286761	4	0.709199	9	4	NP
	3	0.372295	0.0509673	4	0.709188	28	4	MA
	Replicate	0.384271	0.0154926	4	0.70921	21	4	NP
AGV-2	1	0.242042	0.0340118	4	0.703995	20	4	MA
	Replicate	0.256088	0.0388481	4	0.704015	12	4	NP
	2	0.252135	0.0272489	4	0.703996	29	4	MA
	Replicate	0.26888	0.0208268	4	0.704013	14	4	NP
	3	0.260294	0.0137089	4	0.703988	22	4	MA
	Replicate	0.285931	0.0546975	3	0.70402	16	3	NP
n is the number of repeated measurements of the same solution.

## Sheet: Table S4
Table S4: The Sr isotopes of SRM 987 and BHVO-2 after two-stage purification with variation Sr mass loaded.
Sample	No.	Sr mass loaded	δ88/86Sr(‰)	2SD(‰)	87Sr/86Sr	2SD(10-6)	n
SRM 987	1	1ug	-0.000960365	0.0175046	0.710247	19	4
	2	1ug	-0.00540507	0.018888	0.71025	22	4
	3	1ug	0.0011642	0.0132121	0.710258	24	4
	4	1ug	0.00746692	0.0315384	0.71026	15	4
	5	1ug	-2.08356e-06	0.0307748	0.710244	12	4
	average		0.000452719	0.00928561	0.710252	14
BHVO-2	1	0.4ug	0.252493	0.0338539	0.70351	23	4
	1	1ug	0.243836	0.0184485	0.703492	20	4
	2	1ug	0.245796	0.01208	0.703502	22	4
	3	1ug	0.258664	0.0473882	0.703504	50	4
	average		0.249432	0.0161097	0.703499	13
	1	5ug	0.239909	0.0269096	0.703469	16	3
	2	5ug	0.25682	0.041168	0.703471	10	3
	3	5ug	0.243057	0.0132531	0.703473	4	3
	average		0.246595	0.0179872	0.703471	4
	1	10ug	0.2474	0.0224433	0.703475	13	3
	2	10ug	0.240011	0.030396	0.703466	17	3
	3	10ug	0.239493	0.0464519	0.703469	19	3
	average		0.242301	0.00884619	0.70347	9
n is the number of repeated measurements of the same solution.
